# Supplementary material for: Efficacy and Safety of 5-Aminolevulinic Acid Combined with Iron on Skeletal Muscle Mass Index and Physical Performance of Patients with Sarcopenia: A Multicenter, Double-Blinded, Randomized-Controlled Trial (ALADDIN Study)
Source: MDPI journal article supplement (doi:10.3390/nu15132866), 2023-06-24
Supplement: s1 [file s1]

**Supplementary Table S1. Participated medical institutions**

| Participated medical institution             | Responsible investigator | Number of enrolled subjects |
|----------------------------------------------|--------------------------|-----------------------------|
| Yokufukai Hospital                           | Yasuko Abe               | 29                          |
| Juntendo Tokyo Koto Geriatric Medical Center | Hidenori Yoshii          | 21                          |
| Seino Internal Medical Clinic                | Hiroaki Seino            | 14                          |
| Juntendo University Hospital                 | Yoshifumi Tamura         | 10                          |
| Japanese Red Cross Medical Center            | Toru Hiyoshi             | 10                          |
| Misaki Naika Clinic                          | Nobuichi Kuribayashi     | 10                          |
| Saitama Medical University Hospital          | Ikuo Inoue               | 6                           |

**Supplementary Table S2. Eligibility criteria**

---

|                    |                                                                                                                                                                                                                                                                                                                                                                                                                                                                                                                                                                                                                                                                                                                                                                                                                                                           |
|--------------------|-----------------------------------------------------------------------------------------------------------------------------------------------------------------------------------------------------------------------------------------------------------------------------------------------------------------------------------------------------------------------------------------------------------------------------------------------------------------------------------------------------------------------------------------------------------------------------------------------------------------------------------------------------------------------------------------------------------------------------------------------------------------------------------------------------------------------------------------------------------|
| Inclusion criteria | <p>Subjects who meet all of the following criteria are included in this study;</p> <ol style="list-style-type: none"><li>1. Male and female aged 65 years or older giving their consent</li><li>2. Male and female with a walking speed of less than 1 m/sec, men with a hand grip of less than 25 kg, or females with a hand grip of less than 20 kg</li><li>3. Subjects whose body mass index was less than 18.5 kg/m<sup>2</sup>, males with lower leg circumference less than 34 cm, or females whose lower leg circumference was less than 33 cm</li><li>4. Males whose skeletal muscle mass index (SMI) measured by bioimpedance analysis (BIA) was less than 7.0 kg/m<sup>2</sup> or females whose SMI measured by BIA was less than 5.7 kg/m<sup>2</sup></li><li>5. Subjects who could provide written consent</li></ol>                          |
| Exclusion criteria | <p>Subjects who fall into any of the following criteria are excluded from participating in the study;</p> <ol style="list-style-type: none"><li>1. Subjects with rheumatism</li><li>2. Subjects with dementia</li><li>3. Subjects with severe renal dysfunction (whose eGFR<sub>creat</sub> was less than 30 mL/min/1.73 m<sup>2</sup>) or subjects who were treated with dialysis</li><li>4. Subjects with severe hepatic dysfunction (whose AST or ALT was <math>\geq 3</math> times the upper limit of normal at the study execution medical institution)</li><li>5. Crippled subjects who needed legal representation to give consent</li><li>6. Subjects with a history of cerebral or myocardial infarction</li><li>7. Subjects with a pacemaker</li><li>8. Subjects allergic to 5-aminolevulinic acid</li><li>9. Subjects with porphyria</li></ol> |

---

10. Subjects with drug hypersensitivity, such as allergy to iron

11. Subjects with other conditions that the responsible investigator or sub-investigators  
thought inappropriate for participation in the study

---

AST, aspartate aminotransferase; ALT, alanine aminotransferase; eGFR<sub>creat</sub>, estimated glomerular  
filtration rate based on serum creatinine.

**Supplementary Table S3. Observation schedule and items**

|                                                            | consenting | week 0<br>(baseline)* | week 4<br>± 1 week | week 8<br>± 2 weeks | week 12<br>± 2 weeks |
|------------------------------------------------------------|------------|-----------------------|--------------------|---------------------|----------------------|
| Eligibility information                                    | ○          |                       |                    |                     |                      |
| Background characteristics of subjects                     |            | ○                     |                    |                     |                      |
| Blood pressure, calf circumference, and concomitant agents |            | ○                     | ○                  | △                   | ○                    |
| Body composition                                           |            | ○                     | ○                  | △                   | ○                    |
| Physical activity (METs)                                   |            | ○                     |                    |                     |                      |
| 6 minutes walking distance                                 |            | △                     | △                  |                     | △                    |
| Other physical function                                    |            | ○                     | ○                  | △                   | ○                    |
| Blood tests                                                |            | ○                     | ○                  | △                   | ○                    |
| QOL questionnaires                                         |            | ○                     |                    |                     | ○                    |
| Adherence to study food intake                             |            | ← ○ →                 |                    |                     |                      |
| Adverse event                                              |            | ← ○ →                 |                    |                     |                      |

○: mandatory; △: optional

\*Tests at week 0 (baseline) should be conducted before the initiation of the study food intake.

QOL: quality-of-life, METs: metabolic equivalents

**Supplementary Table S4. Primary and secondary endpoints**

---

|                     |                                                                                                                                                                                                                                                                                                                                                                        |
|---------------------|------------------------------------------------------------------------------------------------------------------------------------------------------------------------------------------------------------------------------------------------------------------------------------------------------------------------------------------------------------------------|
| Primary endpoint    | Change in skeletal muscle mass index (SMI) measured by bioimpedance analysis (BIA) from baseline till the 12-week follow-up                                                                                                                                                                                                                                            |
| Secondary endpoints | <ol style="list-style-type: none"><li>1. body weight</li><li>2. BMI</li><li>3. SMI measured by BIA</li><li>4. basal metabolic rate</li><li>5. hand grip</li><li>6. lower leg circumference</li><li>7. physical activity (METs)</li><li>8. 6 minutes walking distance</li><li>9. 5STS</li><li>10. SPPB</li><li>11. SF-36</li><li>12. BDI</li><li>13. EQ-5D-5L</li></ol> |

---

BMI, body mass index; METs, metabolic equivalents; 5STS, 5-repetition sit-to-stand test; SPPB, Short Physical Performance Battery; SF-36, MOS 36-Item Short-Form Health Survey; BDI, Beck Depression Inventory; EQ-5D-5L: EuroQol 5 Dimension-5 Level,
